# Supplementary material for: Revisiting the taxonomy and evolution of pathogenicity of the genus Leptospira through the prism of genomics
Source: PLoS Negl Trop Dis. 2019 May 23;13(5):e0007270. doi: 10.1371/journal.pntd.0007270 (PMC6532842; doi:10.1371/journal.pntd.0007270)
Supplement: S3 Table — (XLSX) [file pntd.0007270.s004.xlsx]

## Sheet: Feuil1
Species	type strain	Subclade	Sites of isolation
L. levettii	MCA2-A1	S2	New Caledonia, Malaysia, Mayotte
L. bouyouniensi	M1A	S2	New Caledonia, Mayotte
L. vanthielii	WaZ Holland	S2	The Netherlands, New Caledonia
L. meyeri	Went 5	S2	France, New Caledonia, Malaysia
L. yanagawae	Sao Paulo	S2	Brazil, New Caledonia
L. biflexa	Patoc 1	S2	Italy, France
L. mtsangambouensis	M2A	S2	Mayotte, Malaysia
L. licerasiae	VAR 10	P2	Peru, Mayotte
L. saintgironsiae	FH4-A2	P2	New Caledonia, Malaysia
L. wolffii	Khorat-H2	P2	Thailand, Malaysia, New Caledonia
L. ellisii	ATI7-A5	P1	New Caledonia, Malaysia
L. barantonii	FH4-A1	P1	New Caledonia, Malaysia
L. dzianensis	M12A	P1	Mayotte, Malaysia
